# Supplementary material
Source: PubMed Central journal article supplement (PMC6352506)
Supplement: Supp_Table1.pdf [file Supp_Table1.pdf]

## Supplementary Data

SUPPLEMENTARY TABLE S1. TOTAL AND TISSUE ENGINEERING-SPECIFIC SALES DATA FOR COMPANIES IN COMMERCIAL DEVELOPMENT STAGE

| <i>Company name</i>                          | <i>Product type</i>                          | <i>Sales (\$ thousand)</i>   | <i>Tissue engineering-specific sales (\$ thousand)</i> | <i>Product/category for Tissue engineering-specific sales</i>                                            | <i>Source</i>                                                                                                                                                                                                                                                                                                                                                                                                  |
|----------------------------------------------|----------------------------------------------|------------------------------|--------------------------------------------------------|----------------------------------------------------------------------------------------------------------|----------------------------------------------------------------------------------------------------------------------------------------------------------------------------------------------------------------------------------------------------------------------------------------------------------------------------------------------------------------------------------------------------------------|
| Allergan                                     | Biomaterials                                 | 6,803,600                    | 433,900                                                | Alloderm<br>Other regenerative medicine                                                                  | <a href="https://www.allergan.com/investors/financial-information/sec-filings">https://www.allergan.com/investors/financial-information/sec-filings</a>                                                                                                                                                                                                                                                        |
| Alliqua BioMedical                           | Biomaterials                                 | 19,565                       | 17,573                                                 | All products included                                                                                    | <a href="https://ir.alliqua.com/all-sec-filings?form_type=10-K">https://ir.alliqua.com/all-sec-filings?form_type=10-K</a>                                                                                                                                                                                                                                                                                      |
| Anika Therapeutics                           | Biomaterials                                 | 113,420                      | 96,571                                                 | Orthobiologics<br>Dermal                                                                                 | <a href="https://ir.anikatherapeutics.com/financial-information/sec-filings">https://ir.anikatherapeutics.com/financial-information/sec-filings</a>                                                                                                                                                                                                                                                            |
| Avita Medical                                | Cells and biomaterials                       | 907                          | 907                                                    | All products included                                                                                    | <a href="http://avitamedical.com/investors/investor-information/">http://avitamedical.com/investors/investor-information/</a>                                                                                                                                                                                                                                                                                  |
| Axogen<br>Cryolife                           | Biomaterials<br>Biomaterials                 | 60,426<br>189,702            | 60,426<br>2116                                         | All products included<br>PhotoFix (decellularized bovine pericardium patch)                              | <a href="https://ir.axogeninc.com/annual-reports">https://ir.axogeninc.com/annual-reports</a><br><a href="http://investors.cryolife.com/financial-information/sec-filings">http://investors.cryolife.com/financial-information/sec-filings</a>                                                                                                                                                                 |
| Cytori Therapeutics<br>Exactech <sup>a</sup> | Stem cells<br>Biomaterials                   | 2689<br>198,213              | 2689<br>19,959                                         | All products included<br>Biologics and spine (other)                                                     | <a href="http://ir.cytori.com/investor-relations/default.aspx">http://ir.cytori.com/investor-relations/default.aspx</a><br><a href="https://www.sec.gov/Archives/edgar/data/913165/000091316517000042/exac2017093010q.htm">https://www.sec.gov/Archives/edgar/data/913165/000091316517000042/exac2017093010q.htm</a>                                                                                           |
| Integra<br>LifeSciences                      | Biomaterials                                 | 1,188,236                    | 467,935                                                | Orthopedics and tissue technologies                                                                      | <a href="http://investor.integralife.com/financial-information/sec-filings">http://investor.integralife.com/financial-information/sec-filings</a>                                                                                                                                                                                                                                                              |
| Medtronic<br>MI Medx Group                   | Biomaterials<br>Biomaterials                 | 29,710,000<br>245,563        | 7,366,000<br>245,015                                   | Restorative therapies group<br>Wound care<br>Surgical, sports medicine and orthopedics                   | <a href="http://phx.corporate-ir.net/phoenix.zhtml?c=3D76126%26p%3Diro1-sec">http://phx.corporate-ir.net/phoenix.zhtml?c=3D76126%26p%3Diro1-sec</a><br><a href="https://mimedx.gcs-web.com/financial-information/sec-filings">https://mimedx.gcs-web.com/financial-information/sec-filings</a>                                                                                                                 |
| Nuo Therapeutics                             | Cells and biomaterials                       | 721                          | 531                                                    | All products included                                                                                    | <a href="http://www.nuot.com/investors/sec-filings/">www.nuot.com/investors/sec-filings/</a>                                                                                                                                                                                                                                                                                                                   |
| Organovo                                     | Cells and biomaterials                       | 4230                         | 3200                                                   | All products included                                                                                    | <a href="http://ir.organovo.com/phoenix.zhtml?c=254194&amp;p=irol-sec">http://ir.organovo.com/phoenix.zhtml?c=254194&amp;p=irol-sec</a>                                                                                                                                                                                                                                                                        |
| Osiris                                       | Cells and biomaterials                       | 119                          | 119                                                    | All products included                                                                                    | <a href="http://investor.osiris.com/financial-information/sec-filings">http://investor.osiris.com/financial-information/sec-filings</a>                                                                                                                                                                                                                                                                        |
| RTI Surgical                                 | Biomaterials                                 | 279,563                      | 77,514                                                 | Spine interbody allograft implant                                                                        | <a href="http://www.rti.com/en_us/investors/sec-filings-and-reports">www.rti.com/en_us/investors/sec-filings-and-reports</a>                                                                                                                                                                                                                                                                                   |
| SeaSpine<br>Smith & Nephew<br>Tissue Regenix | Biomaterials<br>Biomaterials<br>Biomaterials | 131,814<br>4,765,000<br>7065 | 69,128<br>342,000<br>5532                              | Orthobiologics<br>Advanced wound bioactives<br>BioSurgery<br>Orthopedics and dental<br>Carticel and MACI | <a href="http://investor.seaspine.com/phoenix.zhtml?c=254058&amp;p=irol-sec">http://investor.seaspine.com/phoenix.zhtml?c=254058&amp;p=irol-sec</a><br><a href="http://www.smith-nephew.com/annualreport2017/">www.smith-nephew.com/annualreport2017/</a><br><a href="https://www.tissuegenixus.com/investors/reports-and-documentation">https://www.tissuegenixus.com/investors/reports-and-documentation</a> |
| Vercel                                       | Cells and biomaterials                       | 62,760                       | 62,760                                                 | Orthopedics and dental<br>Carticel and MACI                                                              | <a href="http://investors.vcel.com/sec-filings">http://investors.vcel.com/sec-filings</a>                                                                                                                                                                                                                                                                                                                      |
| Wright Medical<br>Group                      | Biomaterials                                 | 744,989                      | 100,637                                                | Biologics                                                                                                | <a href="http://ir.wright.com/phoenix.zhtml?c=129751&amp;p=irol-sec">http://ir.wright.com/phoenix.zhtml?c=129751&amp;p=irol-sec</a>                                                                                                                                                                                                                                                                            |
| Xiant Medical                                | Biomaterials                                 | 90,003                       | 82,513                                                 | All products included                                                                                    | <a href="http://investor.xtantmedical.com/phoenix.zhtml?c=234008&amp;p=irol-sec">http://investor.xtantmedical.com/phoenix.zhtml?c=234008&amp;p=irol-sec</a>                                                                                                                                                                                                                                                    |

Total and tissue engineering-specific sales of individual companies for the 2017 fiscal year (ended December 31, 2017) were gathered by searching through the financial documents (source links provided in the table).

<sup>a</sup>Data reported for nine-month period ending September 30, 2017.
