# Supplementary material
Source: PubMed Central journal article supplement (PMC6352506)
Supplement: Supp_Table2.pdf [file Supp_Table2.pdf]

SUPPLEMENTARY TABLE S2. TISSUE ENGINEERING-SPECIFIC CLINICAL TRIALS

| <i>Category</i>        | <i>Title</i>                                                                                                                                                     | <i>Phase</i>    | <i>Sponsors/<br/>collaborators</i> |
|------------------------|------------------------------------------------------------------------------------------------------------------------------------------------------------------|-----------------|------------------------------------|
| Biomaterials           | A Comparative Postmarketing Study of Commercially Available Peripheral Nerve Gap Repair Options                                                                  | Phase 4         | Industry                           |
| Biomaterials           | A Safety and Efficacy Study of INTEGRA® Dermal Regeneration Template for the Treatment of Diabetic Foot Ulcers                                                   | Not applicable  | Industry                           |
| Cells and biomaterials | A Safety Surveillance Study in Subjects with Macular Degenerative Disease Treated with Human Embryonic Stem Cell-Derived Retinal Pigment Epithelial Cell Therapy | Phase 1 phase 2 | Industry                           |
| Stem cells             | A Study of Modified Stem Cells in Traumatic Brain Injury (TBI)                                                                                                   | Phase 2         | Industry                           |
| Biomaterials           | A Study of VentriGel in Post-MI Patients                                                                                                                         | Phase 1         | Industry                           |
| Stem cells             | A Study to Investigate the Safety and Possible Clinical Benefit of Multistem(r) in Patients with Moderate to Severe Ulcerative Colitis                           | Phase 2         | Industry                           |
| Biomaterials           | Acellular Porcine Dermal Matrix Wound Dressing in the Management of Diabetic Foot Ulcers                                                                         | Phase 3         | Industry, academia                 |
| Stem cells             | Allogeneic Heart Stem Cells to Achieve Myocardial Regeneration                                                                                                   | Phase 1 phase 2 | Industry, government               |
| Biomaterials           | Amniotic Membrane in Total Knee Replacements to Reduce Scarring                                                                                                  | Not applicable  | Industry                           |
| Cells and biomaterials | Bio ACL Reconstruction Amnion Collagen Matrix Wrap and Stem Cells                                                                                                | Not Applicable  | Industry, academia                 |
| Biomaterials           | Bridge-Enhanced ACL Repair vs ACL Reconstruction                                                                                                                 | Not applicable  | Hospital                           |
| Biomaterials           | Bridge-Enhanced ACL Repair-Safety Study (BEAR Trial)                                                                                                             | Phase 1         | Hospital                           |
| Biomaterials           | Case Series of Weekly Applications of dHACM in Treatment of Pressure Ulcers                                                                                      | Not applicable  | Industry                           |
| Stem cells             | CNS10-NPC-GDNF for the Treatment of ALS                                                                                                                          | Phase 1         | Hospital, government               |
| Biomaterials           | Comparative Study of Amniotic Membrane Wound Graft in the Management of Diabetic Foot Ulcers                                                                     | Not Applicable  | Industry                           |
| Biomaterials           | Comparative Study of Two Application Regimens of Amniotic Membrane Wound Graft in the Management of Diabetic Foot Ulcers                                         | Not applicable  | Industry                           |
| Biomaterials           | Dehydrated Human Amnion Chorion Membrane (dHACM) vs. Control in the Treatment of Partial Thickness Burns.                                                        | Not applicable  | Industry                           |
| Biomaterials           | Dehydrated Human Umbilical Cord Allograft in the Management of Diabetic Foot Ulcers                                                                              | Not applicable  | Industry                           |
| Biomaterials           | DermACELL in Subjects with Chronic Wounds of the Lower Extremities                                                                                               | Phase 4         | Industry                           |
| Biomaterials           | dHACM in Lumbar Decompression and Microdiscectomy Surgery                                                                                                        | Not applicable  | Industry                           |
| Biomaterials           | dHACM Mesh in the Treatment of Diabetic Foot Ulcers                                                                                                              | Not applicable  | Industry                           |
| Biomaterials           | DHACM vs Other Commercially Available Treatments                                                                                                                 | Not applicable  | Industry                           |
| Stem cells             | Dose Escalation Study of AST-OPC1 in Spinal Cord Injury                                                                                                          | Phase 1 phase 2 | Industry                           |
| Cells and biomaterials | Endoscopic Mucosal Resection and Cellular Matrix                                                                                                                 | Not applicable  | Hospital                           |
| Biomaterials           | Enhancing Guided Bone Regeneration by Modifying a Resorbable Membrane                                                                                            | Not applicable  | Academia                           |
| Biomaterials           | Evaluate Esophageal Reinforcement with ACell MatriStem Surgical Matrix: A Degradable Biologic scaffold Material                                                  | Phase 2         | Industry, hospital                 |
| Stem cells             | Evaluation of Safety and Exploratory Efficacy of CARTISTEM®, a Cell Therapy Product for Articular Cartilage Defects                                              | Phase 1 phase 2 | Industry                           |
| Cells and biomaterials | Evaluation of Trinity Evolution in Patients Undergoing Foot and Ankle Fusion                                                                                     | Not applicable  | Industry                           |
| Cells and biomaterials | Feasibility Study of the TGI Adipose-derived Stromal Cell (ASC)-Coated ePTFE Vascular Graft                                                                      | Not applicable  | Industry                           |
| Stem cells             | Follow-up Study of Chondrogen® Delivered by Intra-Articular Injection Following Meniscectomy                                                                     | Phase 1 phase 2 | Industry                           |
| Biomaterials           | Grafix® DFU: Open-Label Extension Option to Evaluate Safety & Efficacy of Grafix® for Chronic Diabetic Foot Ulcers                                               | Phase 4         | Industry                           |
| Biomaterials           | GrafixCORE®: Open-Label Study to Evaluate the Safety and Efficacy of GrafixCORE® for Complex Diabetic Foot Wounds                                                | Phase 4         | Industry                           |
| Biomaterials           | GrafixPRIME® for the Treatment of Chronic Diabetic Foot Ulcers                                                                                                   | Phase 4         | Industry                           |
| Biomaterials           | Human Amniotic Membrane Grafting and Standard of Care Versus Standard of Care Alone in the Treatment of Venous Leg Ulcers                                        | Not Applicable  | Industry                           |

(continued)

SUPPLEMENTARY TABLE S2. (CONTINUED)

| <i>Category</i>        | <i>Title</i>                                                                                                                              | <i>Phase</i>    | <i>Sponsors/<br/>collaborators</i> |
|------------------------|-------------------------------------------------------------------------------------------------------------------------------------------|-----------------|------------------------------------|
| Cells and biomaterials | Human Amniotic Tissue-derived Allograft, NuCel, in Posterolateral Lumbar Fusions for Degenerative Disc Disease                            | Not Applicable  | Industry, hospital                 |
| Biomaterials           | HyaloFAST Trial for Repair of Articular Cartilage in the Knee                                                                             | Not applicable  | Industry                           |
| Biomaterials           | INFUSE® Bone Graft/PEEK Interbody Spacer/Anterior Cervical Plate Pivotal Clinical Trial                                                   | Not applicable  | Industry                           |
| Biomaterials           | Investigation of A-ECM for the Correction of Soft Tissue Defects                                                                          | Phase 1         | Industry                           |
| Biomaterials           | Long-Term Follow-Up to the DEVO Pivotal Trial of Dermagraft(R) to Treat Venous Leg Ulcers                                                 | Phase 3         | Industry                           |
| Biomaterials           | Musculotendinous Tissue Repair Unit and Reinforcement (MTURR)                                                                             | Not applicable  | Academia, government               |
| Biomaterials           | NOVOCART®3D for Treatment of Articular Cartilage of the Knee                                                                              | Phase 3         | Industry                           |
| Biomaterials           | OsteoStrux™ Collagen Ceramic scaffold in Instrumented Lumbar Spine Fusion                                                                 | Not applicable  | Industry                           |
| Biomaterials           | Phase IV Study to Evaluate the Efficacy of AMNIOEXCEL in Diabetic Foot Ulcers                                                             | Not applicable  | Industry                           |
| Biomaterials           | Postmarket Study to Evaluate Biovance® in Diabetic Foot Ulcers                                                                            | Not applicable  | Industry                           |
| Biomaterials           | PriMatrix for the Management of Diabetic Foot Ulcers                                                                                      | Not applicable  | Industry                           |
| Cells and biomaterials | Prospective Study of Thoracolumbar Spinal Fusion Graft                                                                                    | Phase 3         | Academia                           |
| Cells and biomaterials | ReCell® Combined with Meshed Skin Graft in the Treatment of Acute Burn Injuries                                                           | Not applicable  | Industry                           |
| Stem cells             | Safety & Efficacy of Adipose-Derived Regenerative Cells in the Treatment of Chronic Myocardial Ischemia (ATHENA II)                       | Phase 2         | Industry                           |
| Cells and biomaterials | Safety and Feasibility of CALEC for LSCD                                                                                                  | Phase 1         | Academia, hospital                 |
| Cells and biomaterials | Safety and Feasibility Study of Autologous Engineered Urethral Constructs for the Treatment of Strictures                                 | Phase 1         | Academia, government               |
| Stem cells             | Safety and Feasibility Trial of Adipose-Derived Regenerative Cells in the Treatment of Chronic Myocardial Ischemia                        | Phase 2         | Industry                           |
| Cells and biomaterials | Safety and Preliminary Efficacy Study of NeoFuse in Subjects Requiring Lumbar Interbody Fusion                                            | Phase 2         | Industry                           |
| Cells and biomaterials | Safety and Preliminary Efficacy Study of NeoFuse in Subjects Undergoing Multilevel Anterior Cervical Discectomy                           | Phase 2         | Industry                           |
| Biomaterials           | Safety Study of Acellular Adipose Tissue for Soft Tissue Reconstruction                                                                   | Phase 1         | Academia, government               |
| Stem cells             | Safety Study of GRNOPC1 in Spinal Cord Injury                                                                                             | Phase 1         | Industry                           |
| Cells and biomaterials | Study of 3 Doses of NeoFuse Combined with MasterGraft Granules in Subjects Requiring Posterolateral Lumbar Fusion (PLF)                   | Phase 1 phase 2 | Industry                           |
| Biomaterials           | Study of Nerve Reconstruction Using AVANCE in Subjects Who Undergo Robotic-Assisted Prostatectomy for Treatment of Prostate Cancer        | Phase 4         | Industry                           |
| Cells and biomaterials | Study of Subretinal Implantation of Human Embryonic Stem Cell-Derived RPE Cells in Advanced Dry AMD                                       | Phase 1 phase 2 | Industry                           |
| Stem cells             | Study to Evaluate the Safety and Preliminary Efficacy of IDCT, a Treatment for Symptomatic Lumbar Intervertebral Disc Degeneration        | Phase 1 phase 2 | Industry                           |
| Stem cells             | Study to Examine the Effects of MultiStem in Ischemic Stroke                                                                              | Phase 2         | Industry                           |
| Biomaterials           | The Effectiveness of Ologen® Collagen Matrix in Preventing Intraocular Pressure (IOP) Spikes After Ahmed Glaucoma Valve Surgery (AGV-FP7) | Phase 2         | Hospital                           |
| Biomaterials           | The INSPIRE Study: Probable Benefit of the Neuro-Spinal scaffold for Treatment of AIS a Thoracic Acute Spinal Cord Injury                 | Phase 3         | Industry                           |
| Cells and biomaterials | Treatment of Alveolar Bone Defects Using Aastrom Biosciences Autologous Tissue Repair Cell Therapy                                        | Phase 1 phase 2 | Academia, industry                 |
| Biomaterials           | Trial of Dehydrated Human Amnion/Chorion Membrane (dHACM) in the Management of Diabetic Foot Ulcers                                       | Not applicable  | Industry                           |
| Biomaterials           | Use of a Collagen Membrane for Soft Tissue Grafting                                                                                       | Phase 1         | Hospital                           |
| Biomaterials           | Use of dHACM in the Treatment of Venous Leg Ulcers                                                                                        | Not applicable  | Industry                           |

Tissue engineering-specific clinical trials that were either completed or ongoing between June 2011 and March 2018 were gathered by searching through the online clinical trials database (available from [clinicaltrials.gov](http://clinicaltrials.gov)).
